# Supplementary material for: Glutathione S‐transferase theta genotypes and environmental exposures in the risk of canine transitional cell carcinoma
Source: PubMed Central journal article supplement — J Vet Intern Med. 2019 Apr 22;33(3):1414–22. doi: 10.1111/jvim.15504 (PMC6524089; doi:10.1111/jvim.15504), 2019-04-22
Supplement: JVIM-33-1414-s001.pdf [file JVIM-33-1414-s001.pdf]

### Dog Cancer and Environment Questionnaire

The **University of Wisconsin-Madison, School of Veterinary Medicine** is conducting a study of genetic and environmental risk factors for certain cancers in dogs.

Along with obtaining a cheek swab sample from your dog for DNA analysis, we are asking you to complete this questionnaire about your dog. All information collected will be kept confidential and will not be linked to you or your family in any publications.

If you have any questions regarding the questionnaire or study, please contact:

Lauren Trepanier, DVM, PhD, DACVIM, DACVCP  
Professor of Internal Medicine  
University of Wisconsin-Madison  
(608) 265 9022  
[lauren.trepanier@wisc.edu](mailto:lauren.trepanier@wisc.edu)

#### I. Dog's General Information

Use clinic card to stamp above, or fill in information below

- Dog's name: \_\_\_\_\_
- Owner's last name: \_\_\_\_\_
- Dog's date of birth: \_\_\_\_\_ / \_\_\_\_\_  
(Month) / (Year)
- If dog's date of birth is unknown, estimated current age: \_\_\_\_\_ years
- Sex: \_\_\_\_\_ Male \_\_\_\_\_ Female
- Neutered: \_\_\_\_\_ Yes \_\_\_\_\_ No If yes, age at neuter: \_\_\_\_\_
- Dog's breed \_\_\_\_\_
- Address and zip code of dog's primary residence  
\_\_\_\_\_
- Name of your primary care veterinarian or clinic, with town  
\_\_\_\_\_

- How old was your dog when you acquired him or her? \_\_\_\_\_
- From where did you acquire your dog? \_\_\_\_\_ (e.g. breeder, pet store, shelter, rescue, stray, family member, friend...)
- Has your dog been diagnosed with bladder cancer?  
\_\_\_\_\_ NO \_\_\_\_\_ Today's date  
\_\_\_\_\_ YES \_\_\_\_\_ Date of cancer diagnosis  
**Name of Veterinarian or Clinic that made the diagnosis**  
\_\_\_\_\_

If your dog does not have bladder cancer, please answer all of the following questions based on the past year.

\*\*\* If your dog has been diagnosed with bladder cancer, please answer all of the following questions as they apply to the **12 months before** the time of diagnosis \*\*\*.

## II. Living Environment

- For the past year, what percentage of your dog's time is spent in the following environments?  
Urban: \_\_\_\_\_ %  
Suburban: \_\_\_\_\_ %  
Rural: \_\_\_\_\_ %  
On a farm: \_\_\_\_\_ %  
Type of farm (crops, animals on site): \_\_\_\_\_  
Don't know: \_\_\_\_\_ %  
Total 100%
- Does your dog go to work with a member of the household (circle one)? Yes No
  - If yes, what type of business does the household member work in?  
\_\_\_\_\_
  - How often does the dog go to work? \_\_\_\_\_ days per month.
- How many hours per day does your dog spend in the following places?:  
In the house \_\_\_\_\_ hours  
In the garage \_\_\_\_\_ hours

In the yard confined \_\_\_\_\_ hours  
Outside yard on leash \_\_\_\_\_ hours  
Outside yard off leash \_\_\_\_\_ hours  
Other (Specify \_\_\_\_\_) \_\_\_\_\_ hours

Total = 24 hours

- Are you aware of any of the following located **within a mile of your home**?

Chemical plant: \_\_\_\_\_ Yes \_\_\_\_\_ No \_\_\_\_\_ Don't know  
Municipal dump: \_\_\_\_\_ Yes \_\_\_\_\_ No \_\_\_\_\_ Don't know  
Landfill: \_\_\_\_\_ Yes \_\_\_\_\_ No \_\_\_\_\_ Don't know  
Rubber, textile, or leather manufacturer: \_\_\_\_\_ Yes \_\_\_\_\_ No \_\_\_\_\_ Don't know  
Coal plant: \_\_\_\_\_ Yes \_\_\_\_\_ No \_\_\_\_\_ Don't know  
Incinerator: \_\_\_\_\_ Yes \_\_\_\_\_ No \_\_\_\_\_ Don't know  
Farm: \_\_\_\_\_ Yes \_\_\_\_\_ No \_\_\_\_\_ Don't know  
Commercial pesticide application: \_\_\_\_\_ Yes \_\_\_\_\_ No \_\_\_\_\_ Don't know  
Name of pesticide company, if known \_\_\_\_\_

- How would you characterize truck and automobile traffic past your house and yard? (check one)

\_\_\_\_\_ Minimal (dead end or country road)  
\_\_\_\_\_ Moderate (suburban neighborhoods and local roads)  
\_\_\_\_\_ Heavy (main thoroughfare or highway)

- In the past year, which of the following products have been used in the house or on your property? (check all that apply)

\_\_\_\_\_ Insecticides (ant, wasp, termites), applied by homeowner  
\_\_\_\_\_ Times per year  
\_\_\_\_\_ Floor polish  
\_\_\_\_\_ Times per year  
\_\_\_\_\_ Furniture polish  
\_\_\_\_\_ Times per year  
\_\_\_\_\_ Upholstery or rug cleaner  
\_\_\_\_\_ Times per year  
\_\_\_\_\_ Paint stripper  
\_\_\_\_\_ Times per year  
\_\_\_\_\_ Weed killer, applied by homeowner  
\_\_\_\_\_ Times per year



- Do one or more members in your household or regular household visitors smoke cigarettes?  
\_\_\_\_\_ Yes    \_\_\_\_\_ No    \_\_\_\_\_ Don't know
  - Over the past year, how many cigarettes were smoked in the house on an average day?  
\_\_\_\_\_
  
- Do one or more members in your household or regular household visitors smoke cigars or pipes at home?  
\_\_\_\_\_ Yes    \_\_\_\_\_ No    \_\_\_\_\_ Don't know
  
- Which of the following flea control products have you used for your dog over the past year?
  - \_\_\_\_\_ "Spot on" topical product for fleas / ticks (small amount applied to skin)  
\_\_\_\_\_ Times per year
  - \_\_\_\_\_ Flea / tick dip  
\_\_\_\_\_ Times per year
  - \_\_\_\_\_ Flea / tick shampoo or powder  
\_\_\_\_\_ Times per year
  - \_\_\_\_\_ Flea / tick collar  
\_\_\_\_\_ Times per year
  - \_\_\_\_\_ Other flea control product (specify type)  
\_\_\_\_\_ Times per year
  
- Please use the space below for anything else you would like to tell us about your dog's lifestyle or environment.

Completed questionnaires can be mailed to:

Dr. Lauren Trepanier  
Professor of Internal Medicine  
University of Wisconsin-Madison, School of Veterinary Medicine  
2015 Linden Drive  
Madison, WI 53706-1102

THANK YOU for your time!

**For Official Use Only**

Date received:

Initials:

Date entered:

Initials:
